# Supplementary material for: Secondary Students’ Knowledge on Birds and Attitudes towards Conservation: Evaluation of an Environmental Education Program
Source: MDPI journal article supplement (doi:10.3390/ijerph20105769), 2023-05-09
Supplement: s1 [file s1]

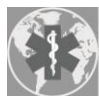

*Supplementary Materials*

# Secondary Students' Knowledge on Birds and Attitudes towards Conservation: Evaluation of an Environmental Education Program

Unai Ortega-Lasuen <sup>1,\*</sup>, Oier Pedrera <sup>2</sup>, Erin Telletxea <sup>1</sup>, Oihana Barrutia <sup>2</sup> and José Ramón Díez <sup>1</sup>

<sup>1</sup> Department of Didactics of Mathematics, Experimental and Social Sciences, University of the Basque Country (UPV/EHU), 48940 Leioa, Spain

<sup>2</sup> Department of Didactics of Mathematics, Experimental and Social Sciences, University of the Basque Country (UPV/EHU), 20018 Donostia San Sebastian, Spain

\* Correspondence: unai.ortega@ehu.eus; Tel.: +34-946-014-560

## STUDENT'S QUESTIONNAIRE

- Girl or boy? .....
- School: .....
- Course: .....
- Hometown: .....
- What was your school in Primary Education? .....
- Have you ever visited Urdaibai Bird Center?      ☐ Yes      ☐ No
- With whom you visited?      ☐ Family      ☐ School      ☐ Others: .....
- If you visited it with School, have you repeated?      ☐ Yes      ☐ No
- What is a Biosphere Reserve? (Pick all the options you think are right)
  - ☐ I've never heard that word before
  - ☐ I don't quite understand it, but I've heard the word sometime
  - ☐ I understand a little
  - ☐ I understand pretty well
  - ☐ I get it right and I can explain it to a friend
- In your opinion in the Urdaibai Biosphere Reserve... (Pick all the options you think are right)
  - ☐ conservation and development are equally encouraged
  - ☐ conservation measures are very strict
  - ☐ conservation takes precedence over the interests of the people
  - ☐ the interests of the people are above conservation
  - ☐ I don't know

- **Why is Urdaibai Biosphere Reserve important?** (Pick all the options you think are right)
  - ☐ Because of the diversity of habitats in a small area
  - ☐ Because it plays a crucial role for migratory birds in making their way
  - ☐ Because it attracts a lot of tourists
  - ☐ I don't think Urdaibai Biosphere Reserve is important
  - ☐ I don't know
- **What is a marsh?** (Pick all the options you think are right)
  - ☐ I've never heard that word before
  - ☐ I don't quite understand it, but I've heard the word sometime
  - ☐ I understand a little
  - ☐ I understand pretty well
  - ☐ I get it right and I can explain it to a friend
- **Why are they important Urdaibai's marshes?** (Pick all the options you think are right)
  - ☐ Because marshes are very productive ecosystems
  - ☐ Because they are necessary for waterbirds
  - ☐ Marshes are not important
  - ☐ I don't know
- **Are you interested in animals and/or plants that live in Urdaibai?** (Just pick one answer)
  - ☐ Animals
  - ☐ Plants
  - ☐ Animals and plants
  - ☐ Neither
- **What is your interest in birds?** (Just pick one answer)
  - ☐ Very little
  - ☐ Little
  - ☐ Halfway
  - ☐ Big
  - ☐ Very big
- **Why do some birds migrate?** (Just pick one answer)
  - ☐ They just migrate for heat
  - ☐ They migrate for food
  - ☐ Birds don't migrate
- **Where do birds migrate?** (Just pick one answer)
  - ☐ All birds migrate to the same place
  - ☐ Every bird species has its route, some go to Africa
  - ☐ Birds don't migrate

- Fill in the next table:

|                                                                                         |                                                                                         |                                                                                         |                                                                                         |                                                                                         |
|-----------------------------------------------------------------------------------------|-----------------------------------------------------------------------------------------|-----------------------------------------------------------------------------------------|-----------------------------------------------------------------------------------------|-----------------------------------------------------------------------------------------|
|        |        |        |       |      |
| Name: .....<br>.....                                                                    |
| Can it be seen in Urdaibai?<br><input type="checkbox"/> Yes <input type="checkbox"/> No | Can it be seen in Urdaibai?<br><input type="checkbox"/> Yes <input type="checkbox"/> No | Can it be seen in Urdaibai?<br><input type="checkbox"/> Yes <input type="checkbox"/> No | Can it be seen in Urdaibai?<br><input type="checkbox"/> Yes <input type="checkbox"/> No | Can it be seen in Urdaibai?<br><input type="checkbox"/> Yes <input type="checkbox"/> No |
| Does it migrate?<br><input type="checkbox"/> Yes <input type="checkbox"/> No            | Does it migrate?<br><input type="checkbox"/> Yes <input type="checkbox"/> No            | Does it migrate?<br><input type="checkbox"/> Yes <input type="checkbox"/> No            | Does it migrate?<br><input type="checkbox"/> Yes <input type="checkbox"/> No            | Does it migrate?<br><input type="checkbox"/> Yes <input type="checkbox"/> No            |
|       |       |       |      |     |
| Name: .....<br>.....                                                                    |
| Can it be seen in Urdaibai?<br><input type="checkbox"/> Yes <input type="checkbox"/> No | Can it be seen in Urdaibai?<br><input type="checkbox"/> Yes <input type="checkbox"/> No | Can it be seen in Urdaibai?<br><input type="checkbox"/> Yes <input type="checkbox"/> No | Can it be seen in Urdaibai?<br><input type="checkbox"/> Yes <input type="checkbox"/> No | Can it be seen in Urdaibai?<br><input type="checkbox"/> Yes <input type="checkbox"/> No |
| Does it migrate?<br><input type="checkbox"/> Yes <input type="checkbox"/> No            | Does it migrate?<br><input type="checkbox"/> Yes <input type="checkbox"/> No            | Does it migrate?<br><input type="checkbox"/> Yes <input type="checkbox"/> No            | Does it migrate?<br><input type="checkbox"/> Yes <input type="checkbox"/> No            | Does it migrate?<br><input type="checkbox"/> Yes <input type="checkbox"/> No            |

- Value the following sentences from 1 (TOTAL DISAGREEMENT) to 5 (TOTAL AGREEMENT) and indicate with an X the option you think best:

|                                                                                                                                      |   |   |   |   |   |
|--------------------------------------------------------------------------------------------------------------------------------------|---|---|---|---|---|
| Marshes in the Urdaibai Biosphere Reserve are wetlands of high biodiversity                                                          | 1 | 2 | 3 | 4 | 5 |
| Conservation of the Urdaibai Biosphere Reserve should be increased                                                                   | 1 | 2 | 3 | 4 | 5 |
| Losing a part of Urdaibai Biosphere Reserve's biodiversity is acceptable                                                             | 1 | 2 | 3 | 4 | 5 |
| I think that the conservation of Urdaibai Biosphere Reserve is necessary                                                             | 1 | 2 | 3 | 4 | 5 |
| I have a personal responsibility to help in the conservation of Urdaibai Biosphere Reserve's biodiversity and its endangered species | 1 | 2 | 3 | 4 | 5 |

Thank you very much for your collaboration!
